# Supplementary material for: Preparation and Permeation Properties of a pH-Responsive Polyacrylic Acid Coated Porous Alumina Membrane
Source: MDPI journal article supplement (doi:10.3390/membranes13010082), 2023-01-09
Supplement: s1 [file s1]

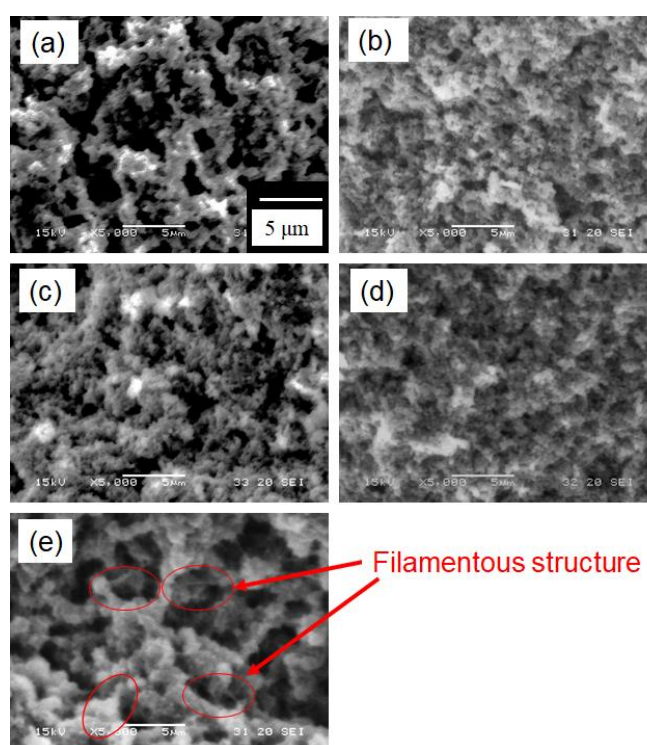

**Figure S1.** SEM image of cross section of membrane obtained each step (a: Raw support, b: After first step, c: After second step, d: After third step, e: After fourth step with 4 times of polymerization).
